# Supplementary material for: Mef2C restrains microglial inflammatory response and is lost in brain ageing in an IFN-I-dependent manner
Source: PubMed Central journal article supplement (PMC5620041; doi:10.1038/s41467-017-00769-0), 2017-09-28
Supplement: 41467_2017_769_MOESM3_ESM.pdf [file 41467_2017_769_MOESM3_ESM.pdf]

## **Description of Additional Supplementary Files**

File name: Supplementary Data 1

Description: Transcriptional profiling of microglia of young (3 month-old) and aged (22 month-old) mice.

File name: Supplementary Data 2

Description: Transcriptional profiling of microglia of untreated young mice (3 month-old) and aged (22 month-old) mice treated with anti-IFNAR or isotype control (IgG) antibodies 2, 7 or 14 days after the treatment.

File name: Supplementary Data 3

Description: Transcriptional profiling of microglia of young (3 month-old) mice infected with IFN- $\beta$ - expressing (AAV-IFN- $\beta$ ) or empty (AAV-Ctrl) adeno-associated virus to their choroid plexi.

File name: Supplementary Data 4

Description: Transcriptional profiling of microglia of mic-IFNAR-CTRL and mic-IFNAR-KO mice infected with AAV-IFN $\beta$  or AAV-CTRL to their choroid plexi.

File name: Supplementary Data 5

Description: Transcriptional profiling of microglia of Mef2C-KO and Mef2C-CTRL mice.
